# Supplementary material for: Antimicrobial hydroxyapatite–gelatin–silica composite pastes with tunable setting properties
Source: Royal Society of Chemistry journal article supplement (doi:10.1039/c7tb01794d), 2017-01-01
Supplement: c7tb01794d1.pdf [file c7tb01794d1.pdf]

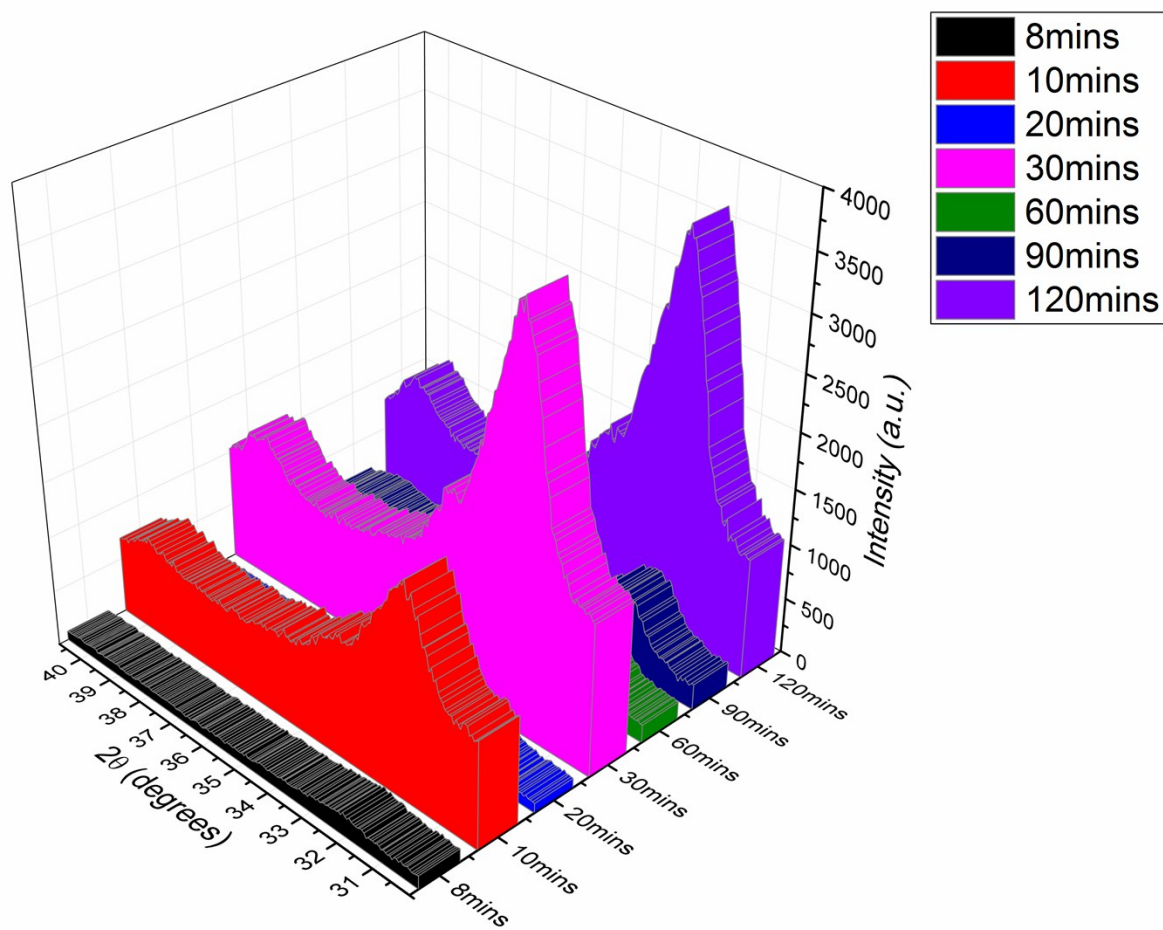

Fig.S1. Timelapse XRD patterns of the composite HAp pastes containing 26.5 wt.% of gelatin in the course of an extended setting reaction with a nonlinear, oscillatory dynamics.
